# Supplementary material for: Modifying VEGF-A mRNA by Combinatorial Optimization to Enhance Therapeutic Efficacy for Myocardial Infarction
Source: Research Square preprint supplement (doi:10.21203/rs.3.rs-8268281/v1), 2026-01-14
Supplement: Supplementary file 1 [file 0084b76b2d2edc566d987cf5.xlsx]

## Sheet: CDS
Supplemental table 1 Nucleotide sequence information of the different elements
Manuscript Title: Modifying VEGF-A mRNA by Combinatorial Optimization to Enhance Therapeutic Efficacy for Myocardial Infarction
Journal Name: Cardiovascular Drugs and Therapy
Authors: Wei Wang, Zhenping Zhan, Lan Chen, Lei Wang, Shizheng Liu, Zirong Lin, Kanglin Wang
Corresponding Author: Kanglin Wang
Affiliation: Knature Bio-pharm Co., Ltd., No. 32 Meichong Lake Road, Hefei, P.R. China
Email: wangkanglin@knb-pharma.com
Name	5'-UTR	3'-UTR	Poly(A)	mRNA sequence
CDS101	CBT3	CBT4	A100	AGGAAAUAAGAGAGAAAAGAAGAGUAAGAAGAAAUAUAAGAGCCACCAUGAACUUCCUGCUGAGCUGGGUGCACUGGAGCCUGGCCCUGCUGCUGUACCUGCACCACGCCAAGUGGAGCCAGGCCGCACCCAUGGCCGAGGGCGGCGGCCAGAACCACCACGAGGUGGUGAAGUUCAUGGACGUGUACCAGCGGAGCUACUGCCACCCCAUCGAGACACUGGUGGACAUCUUCCAGGAGUACCCAGACGAGAUCGAGUACAUCUUCAAGCCCAGCUGCGUGCCCCUGAUGCGGUGCGGCGGCUGCUGCAACGACGAGGGCCUGGAGUGCGUGCCCACCGAGGAGAGCAACAUCACCAUGCAGAUCAUGCGGAUCAAGCCACACCAGGGCCAGCACAUCG…
CDS102	CBT3	CBT4	A100	AGGAAAUAAGAGAGAAAAGAAGAGUAAGAAGAAAUAUAAGAGCCACCAUGAACUUCCUGCUGAGCUGGGUGCACUGGAGCCUGGCCCUGCUGCUGUACCUGCACCACGCCAAGUGGAGCCAGGCCGCACCCAUGGCCGAGGGCGGCGGCCAGAACCACCACGAGGUGGUGAAGUUCAUGGACGUGUACCAGCGGAGCUACUGCCACCCAAUCGAGACACUGGUGGACAUCUUCCAGGAGUACCCAGACGAGAUCGAGUACAUCUUCAAGCCCAGCUGCGUGCCCCUGAUGCGGUGCGGCGGCUGCUGCAACGACGAGGGCCUGGAGUGCGUGCCCACCGAGGAGAGCAACAUCACCAUGCAGAUCAUGCGGAUCAAGCCCCACCAGGGCCAGCACAUCG…
CDS103	CBT3	CBT4	A100	AGGAAAUAAGAGAGAAAAGAAGAGUAAGAAGAAAUAUAAGAGCCACCAUGAACUUCCUGCUGAGCUGGGUGCACUGGAGCCUGGCCCUGCUGCUGUACCUGCACCACGCCAAGUGGAGCCAGGCCGCACCCAUGGCCGAGGGCGGCGGCCAGAACCACCACGAGGUGGUGAAGUUCAUGGACGUGUACCAGCGGAGCUACUGCCACCCCAUCGAGACACUGGUGGACAUCUUCCAGGAGUACCCCGACGAGAUCGAGUACAUCUUCAAGCCCAGCUGCGUGCCCCUGAUGCGGUGCGGCGGCUGCUGCAACGACGAGGGCCUGGAGUGCGUGCCAACCGAGGAGAGCAACAUCACCAUGCAGAUCAUGCGGAUCAAGCCCCACCAGGGCCAGCACAUCG…
CDS104	CBT3	CBT4	A100	AGGAAAUAAGAGAGAAAAGAAGAGUAAGAAGAAAUAUAAGAGCCACCAUGAACUUCCUGCUGAGCUGGGUGCACUGGAGCCUGGCCCUGCUGCUGUACCUGCACCACGCCAAGUGGAGCCAGGCCGCACCCAUGGCCGAGGGCGGCGGCCAGAACCACCACGAGGUGGUGAAGUUCAUGGACGUGUACCAGCGGAGCUACUGCCACCCCAUCGAGACACUGGUGGACAUCUUCCAGGAGUACCCCGACGAGAUCGAGUACAUCUUCAAGCCCAGCUGCGUGCCCCUGAUGCGGUGCGGCGGCUGCUGCAACGACGAGGGCCUGGAGUGCGUGCCCACCGAGGAGAGCAACAUCACCAUGCAGAUCAUGCGGAUCAAGCCCCACCAGGGCCAGCACAUCG…
CDS105	CBT3	CBT4	A100	AGGAAAUAAGAGAGAAAAGAAGAGUAAGAAGAAAUAUAAGAGCCACCAUGAACUUCCUGCUGAGCUGGGUGCACUGGAGCCUGGCCCUGCUGCUGUACCUGCACCACGCCAAGUGGAGCCAGGCCGCCCCAAUGGCCGAGGGCGGCGGCCAGAACCACCACGAGGUGGUGAAGUUCAUGGACGUGUACCAGCGGAGCUACUGCCACCCCAUCGAGACACUGGUGGACAUCUUCCAGGAGUACCCCGACGAGAUCGAGUACAUCUUCAAGCCCAGCUGCGUGCCCCUGAUGCGGUGCGGCGGCUGCUGCAACGACGAGGGCCUGGAGUGCGUGCCCACCGAGGAGAGCAACAUCACCAUGCAGAUCAUGCGGAUCAAGCCCCACCAGGGCCAGCACAUCG…
CDS106	CBT3	CBT4	A100	AGGAAAUAAGAGAGAAAAGAAGAGUAAGAAGAAAUAUAAGAGCCACCAUGAACUUCCUGCUGAGCUGGGUGCACUGGAGCCUGGCCCUGCUGCUGUACCUGCACCACGCCAAGUGGAGCCAGGCCGCACCCAUGGCCGAGGGCGGCGGCCAGAACCACCACGAGGUGGUGAAGUUCAUGGACGUGUACCAGCGGAGCUACUGCCACCCCAUCGAGACACUGGUGGACAUCUUCCAGGAGUACCCCGACGAGAUCGAGUACAUCUUCAAGCCCAGCUGCGUGCCCCUGAUGCGGUGCGGCGGCUGCUGCAACGACGAGGGCCUGGAGUGCGUGCCCACCGAGGAGAGCAACAUCACCAUGCAGAUCAUGCGGAUCAAGCCACACCAGGGCCAGCACAUCG…
CDS107	CBT3	CBT4	A100	AGGAAAUAAGAGAGAAAAGAAGAGUAAGAAGAAAUAUAAGAGCCACCAUGAACUUCCUGCUGAGCUGGGUGCACUGGAGCCUGGCCCUGCUGCUGUACCUGCACCACGCCAAGUGGAGCCAGGCCGCACCCAUGGCCGAGGGCGGCGGCCAGAACCACCACGAGGUGGUGAAGUUCAUGGACGUGUACCAGCGGAGCUACUGCCACCCCAUCGAGACACUGGUGGACAUCUUCCAGGAGUACCCAGACGAGAUCGAGUACAUCUUCAAGCCCAGCUGCGUGCCCCUGAUGCGGUGCGGCGGCUGCUGCAACGACGAGGGCCUGGAGUGCGUGCCCACCGAGGAGAGCAACAUCACCAUGCAGAUCAUGCGGAUCAAGCCCCACCAGGGCCAGCACAUCG…
CDS108	CBT3	CBT4	A100	AGGAAAUAAGAGAGAAAAGAAGAGUAAGAAGAAAUAUAAGAGCCACCAUGAACUUCCUGCUGAGCUGGGUGCACUGGAGCCUGGCCCUGCUGCUGUACCUGCACCACGCCAAGUGGAGCCAGGCCGCACCCAUGGCCGAGGGCGGCGGCCAGAACCACCACGAGGUGGUGAAGUUCAUGGACGUGUACCAGCGGAGCUACUGCCACCCCAUCGAGACACUGGUGGACAUCUUCCAGGAGUACCCCGACGAGAUCGAGUACAUCUUCAAGCCCAGCUGCGUGCCCCUGAUGCGGUGCGGCGGCUGCUGCAACGACGAGGGCCUGGAGUGCGUGCCAACCGAGGAGAGCAACAUCACCAUGCAGAUCAUGCGGAUCAAGCCCCACCAGGGCCAGCACAUCG…
CDS109	CBT3	CBT4	A100	AGGAAAUAAGAGAGAAAAGAAGAGUAAGAAGAAAUAUAAGAGCCACCAUGAACUUCCUGCUGAGCUGGGUGCACUGGAGCCUGGCCCUGCUGCUGUACCUGCACCACGCCAAGUGGAGCCAGGCCGCACCCAUGGCCGAGGGCGGCGGCCAGAACCACCACGAGGUGGUGAAGUUCAUGGACGUGUACCAGCGGAGCUACUGCCACCCCAUCGAGACACUGGUGGACAUCUUCCAGGAGUACCCCGACGAGAUCGAGUACAUCUUCAAGCCAAGCUGCGUGCCACUGAUGCGGUGCGGCGGCUGCUGCAACGACGAGGGCCUGGAGUGCGUGCCCACCGAGGAGAGCAACAUCACCAUGCAGAUCAUGCGGAUCAAGCCCCACCAGGGCCAGCACAUCG…
CDS110	CBT3	CBT4	A100	AGGAAAUAAGAGAGAAAAGAAGAGUAAGAAGAAAUAUAAGAGCCACCAUGAACUUCCUGCUGAGCUGGGUGCACUGGAGCCUGGCCCUGCUGCUGUACCUGCACCACGCCAAGUGGAGCCAGGCCGCACCCAUGGCCGAGGGCGGCGGCCAGAACCACCACGAGGUGGUGAAGUUCAUGGACGUGUACCAGCGGAGCUACUGCCACCCCAUCGAGACACUGGUGGACAUCUUCCAGGAGUACCCCGACGAGAUCGAGUACAUCUUCAAGCCCAGCUGCGUGCCCCUGAUGCGGUGCGGCGGCUGCUGCAACGACGAGGGCCUGGAGUGCGUGCCCACCGAGGAGAGCAACAUCACCAUGCAGAUCAUGCGGAUCAAGCCCCACCAGGGCCAGCACAUCG…
CDS201	CBT3	CBT4	A100	AGGAAAUAAGAGAGAAAAGAAGAGUAAGAAGAAAUAUAAGAGCCACCAUGAACUUCCUGCUGAGCUGGGUGCACUGGAGCCUGGCUCUGCUGCUGUACCUGCACCAUGCCAAGUGGAGCCAGGCUGCCCCUAUGGCUGAAGGCGGAGGCCAGAAUCAUCACGAAGUCGUGAAGUUCAUGGACGUGUAUCAGCGGAGCUAUUGCCACCCCAUUGAGACACUGGUGGACAUCUUCCAGGAGUAUCCCGACGAGAUUGAGUACAUCUUCAAGCCCAGCUGCGUCCCUCUGAUGCGGUGCGGAGGCUGCUGUAAUGACGAGGGCCUGGAAUGCGUCCCUACCGAAGAGUCUAACAUCACCAUGCAGAUCAUGCGGAUCAAGCCCCACCAGGGCCAGCAUAUUG…
CDS202	CBT3	CBT4	A100	AGGAAAUAAGAGAGAAAAGAAGAGUAAGAAGAAAUAUAAGAGCCACCAUGAACUUCCUGCUGAGCUGGGUGCACUGGAGCCUGGCCCUGCUGCUGUACCUGCAUCACGCCAAGUGGAGCCAGGCUGCCCCUAUGGCCGAGGGCGGAGGCCAGAAUCACCAUGAGGUCGUGAAGUUCAUGGACGUGUACCAGAGAAGCUACUGCCACCCUAUCGAGACACUGGUGGAUAUCUUCCAGGAAUACCCCGAUGAGAUCGAAUACAUCUUCAAGCCUAGCUGUGUGCCCCUGAUGCGGUGCGGAGGCUGCUGUAACGACGAAGGACUGGAGUGUGUGCCUACCGAAGAGAGCAACAUCACCAUGCAGAUCAUGAGAAUCAAGCCCCACCAGGGACAGCACAUCG…
CDS203	CBT3	CBT4	A100	AGGAAAUAAGAGAGAAAAGAAGAGUAAGAAGAAAUAUAAGAGCCACCAUGAACUUCCUGCUGAGCUGGGUCCAUUGGAGCCUGGCCCUGCUGCUGUACCUGCAUCACGCCAAGUGGAGCCAGGCUGCCCCUAUGGCCGAAGGCGGAGGCCAGAACCACCAUGAAGUCGUGAAGUUCAUGGACGUGUACCAGAGAUCCUACUGCCACCCCAUCGAGACACUGGUGGACAUCUUCCAGGAGUACCCCGAUGAGAUCGAGUACAUCUUCAAGCCUAGCUGUGUGCCUCUGAUGAGAUGCGGAGGCUGUUGCAACGAUGAGGGCCUGGAAUGUGUGCCUACCGAGGAAUCCAACAUCACAAUGCAGAUCAUGCGGAUCAAGCCCCACCAGGGCCAGCACAUUG…
CDS204	CBT3	CBT4	A100	AGGAAAUAAGAGAGAAAAGAAGAGUAAGAAGAAAUAUAAGAGCCACCAUGAACUUCCUGCUGAGCUGGGUGCACUGGAGCCUGGCCCUGCUGCUGUACCUGCAUCACGCCAAGUGGAGCCAGGCCGCUCCUAUGGCCGAGGGCGGAGGCCAGAAUCACCAUGAGGUCGUGAAGUUCAUGGACGUCUACCAGCGGAGCUACUGCCACCCCAUCGAGACACUGGUCGAUAUCUUCCAGGAGUACCCUGACGAGAUUGAGUACAUCUUCAAGCCUUCUUGCGUGCCUCUGAUGAGAUGCGGCGGAUGCUGUAAUGAUGAGGGCCUGGAAUGUGUGCCUACCGAAGAGAGCAAUAUCACAAUGCAGAUCAUGAGAAUCAAGCCUCACCAGGGCCAGCAUAUUG…
CDS205	CBT3	CBT4	A100	AGGAAAUAAGAGAGAAAAGAAGAGUAAGAAGAAAUAUAAGAGCCACCAUGAACUUCCUGCUGUCCUGGGUGCACUGGUCCCUGGCCCUGCUGCUGUACCUGCAUCACGCCAAGUGGAGCCAGGCCGCUCCCAUGGCUGAGGGCGGAGGCCAGAACCAUCACGAGGUCGUGAAGUUCAUGGAUGUGUACCAGAGAUCCUACUGUCACCCCAUCGAGACACUGGUGGACAUCUUCCAGGAGUACCCCGACGAGAUCGAAUACAUCUUCAAGCCCUCCUGCGUGCCUCUGAUGAGAUGUGGAGGCUGUUGCAACGAUGAGGGCCUGGAGUGCGUGCCUACCGAAGAGAGCAACAUCACCAUGCAGAUCAUGAGAAUCAAGCCCCACCAGGGCCAGCACAUCG…
CDS206	CBT3	CBT4	A100	AGGAAAUAAGAGAGAAAAGAAGAGUAAGAAGAAAUAUAAGAGCCACCAUGAACUUCCUGCUGAGCUGGGUGCAUUGGUCCCUGGCCCUGCUGCUGUACCUGCAUCACGCUAAGUGGUCCCAGGCUGCCCCUAUGGCCGAAGGCGGAGGCCAGAACCAUCACGAGGUCGUGAAGUUCAUGGACGUGUAUCAGAGAAGCUACUGUCACCCCAUCGAGACACUGGUGGAUAUCUUCCAGGAGUACCCUGACGAGAUCGAGUACAUCUUCAAGCCCAGCUGCGUGCCCCUGAUGCGGUGCGGCGGAUGUUGCAACGACGAAGGCCUGGAAUGUGUGCCCACAGAAGAGAGCAACAUCACCAUGCAGAUUAUGAGAAUCAAGCCUCACCAGGGCCAGCACAUCG…
CDS207	CBT3	CBT4	A100	AGGAAAUAAGAGAGAAAAGAAGAGUAAGAAGAAAUAUAAGAGCCACCAUGAACUUCCUGCUGUCCUGGGUGCACUGGAGCCUGGCCCUGCUGCUGUACCUGCACCAUGCUAAGUGGUCCCAGGCCGCUCCUAUGGCCGAGGGAGGCGGACAGAACCACCAUGAGGUGGUCAAGUUCAUGGACGUGUACCAGAGAAGCUAUUGCCAUCCUAUUGAGACACUGGUCGAUAUCUUCCAGGAGUACCCUGACGAGAUCGAAUACAUCUUCAAGCCUUCUUGCGUGCCUCUGAUGAGAUGCGGAGGCUGUUGCAACGACGAGGGCCUGGAGUGCGUCCCUACAGAAGAGAGCAACAUCACAAUGCAGAUCAUGAGAAUCAAGCCUCAUCAGGGACAGCACAUCG…
CDS208	CBT3	CBT4	A100	AGGAAAUAAGAGAGAAAAGAAGAGUAAGAAGAAAUAUAAGAGCCACCAUGAACUUCCUGCUGUCUUGGGUGCACUGGAGCCUGGCCCUGCUGCUGUAUCUGCAUCACGCUAAGUGGAGCCAGGCUGCCCCUAUGGCCGAAGGAGGCGGACAGAACCAUCACGAGGUCGUGAAGUUCAUGGACGUGUACCAGCGGUCUUACUGCCACCCUAUCGAGACACUGGUGGACAUCUUCCAGGAAUACCCUGAUGAGAUCGAGUACAUCUUCAAGCCUAGCUGCGUGCCCCUGAUGAGAUGCGGAGGCUGCUGUAAUGACGAGGGCCUGGAGUGCGUCCCCACAGAAGAGAGCAACAUUACCAUGCAGAUCAUGAGAAUUAAGCCCCAUCAGGGCCAGCACAUCG…
CDS209	CBT3	CBT4	A100	AGGAAAUAAGAGAGAAAAGAAGAGUAAGAAGAAAUAUAAGAGCCACCAUGAACUUCCUGCUGAGCUGGGUGCACUGGAGCCUGGCCCUGCUGCUGUACCUGCAUCACGCCAAGUGGAGCCAGGCCGCUCCCAUGGCCGAGGGCGGAGGCCAGAAUCACCAUGAAGUCGUGAAGUUCAUGGAUGUGUACCAGAGAAGCUACUGUCACCCCAUUGAGACACUGGUCGACAUCUUCCAGGAGUACCCUGAUGAGAUUGAAUACAUCUUCAAGCCCUCCUGCGUGCCCCUGAUGCGGUGCGGAGGCUGUUGCAACGACGAGGGCCUGGAGUGCGUGCCCACCGAAGAGAGCAAUAUCACCAUGCAGAUUAUGCGGAUCAAGCCUCACCAGGGCCAGCACAUCG…
CDS210	CBT3	CBT4	A100	AGGAAAUAAGAGAGAAAAGAAGAGUAAGAAGAAAUAUAAGAGCCACCAUGAACUUCCUGCUGAGCUGGGUGCACUGGUCCCUGGCCCUGCUGCUGUACCUGCACCAUGCUAAGUGGAGCCAGGCCGCUCCCAUGGCCGAGGGCGGAGGCCAGAACCAUCACGAAGUCGUGAAGUUCAUGGAUGUGUACCAGAGAAGCUACUGCCAUCCUAUCGAGACACUGGUGGACAUCUUCCAGGAGUACCCCGACGAGAUCGAGUACAUCUUCAAGCCUAGCUGCGUGCCCCUGAUGCGGUGUGGCGGAUGUUGCAACGACGAAGGCCUGGAGUGCGUGCCUACAGAGGAAUCUAACAUCACCAUGCAGAUUAUGCGGAUCAAGCCCCACCAGGGACAGCACAUCG…
CDS301	CBT3	CBT4	A100	AGGAAAUAAGAGAGAAAAGAAGAGUAAGAAGAAAUAUAAGAGCCACCAUGAACUUCCUCCUUAGUUGGGUGCAUUGGAGCCUGGCCUUACUGCUCUACCUGCACCAUGCCAAGUGGUCCCAGGCGGCCCCUAUGGCAGAAGGCGGUGGGCAGAACCAUCACGAGGUCGUUAAGUUCAUGGAUGUAUAUCAGCGAAGCUACUGCCACCCAAUAGAGACACUAGUCGAUAUCUUCCAGGAGUACCCAGACGAGAUCGAAUACAUAUUCAAGCCCAGCUGCGUCCCUCUGAUGCGGUGCGGAGGGUGUUGCAACGACGAAGGCCUGGAGUGCGUACCCACAGAAGAGUCCAACAUCACCAUGCAGAUCAUGCGUAUCAAGCCCCAUCAAGGUCAACACAUAG…
CDS302	CBT3	CBT4	A100	AGGAAAUAAGAGAGAAAAGAAGAGUAAGAAGAAAUAUAAGAGCCACCAUGAACUUCCUACUGUCUUGGGUCCAUUGGUCACUCGCCCUCCUUCUGUAUCUGCAUCACGCCAAGUGGUCACAAGCUGCGCCCAUGGCUGAGGGCGGUGGCCAGAACCACCAUGAGGUAGUCAAGUUCAUGGACGUGUAUCAGCGGAGCUAUUGUCACCCUAUUGAGACACUGGUAGACAUCUUCCAGGAGUACCCCGACGAGAUAGAGUACAUAUUCAAGCCAAGCUGCGUUCCGCUGAUGCGGUGCGGUGGCUGCUGUAAUGACGAGGGGUUGGAGUGCGUGCCAACUGAAGAGUCCAAUAUCACCAUGCAGAUAAUGAGAAUCAAGCCCCACCAGGGACAGCAUAUAG…
CDS303	CBT3	CBT4	A100	AGGAAAUAAGAGAGAAAAGAAGAGUAAGAAGAAAUAUAAGAGCCACCAUGAACUUCUUGUUAUCUUGGGUCCAUUGGAGCUUAGCCCUAUUGCUCUACUUGCAUCACGCUAAGUGGAGUCAGGCAGCCCCGAUGGCCGAAGGAGGCGGGCAGAAUCACCAUGAGGUCGUGAAGUUCAUGGAUGUGUACCAGCGGUCUUACUGUCACCCCAUCGAGACACUCGUGGAUAUCUUCCAAGAAUAUCCUGACGAGAUCGAGUAUAUAUUCAAGCCGUCAUGUGUGCCCCUUAUGCGAUGUGGCGGUUGCUGUAACGAUGAGGGCUUAGAGUGUGUACCUACAGAAGAGUCUAAUAUCACAAUGCAGAUCAUGCGUAUUAAGCCCCACCAGGGUCAGCACAUCG…
CDS304	CBT3	CBT4	A100	AGGAAAUAAGAGAGAAAAGAAGAGUAAGAAGAAAUAUAAGAGCCACCAUGAACUUCUUGCUGUCUUGGGUGCAUUGGAGCUUGGCCCUGCUCCUGUAUCUCCAUCACGCGAAGUGGUCACAAGCCGCUCCCAUGGCCGAGGGAGGCGGACAGAACCACCAUGAAGUGGUCAAGUUCAUGGACGUGUACCAACGCUCAUACUGCCAUCCGAUCGAGACUCUUGUGGAUAUCUUCCAGGAGUAUCCCGAUGAGAUCGAAUAUAUAUUCAAGCCUUCAUGUGUGCCUCUCAUGCGCUGCGGCGGAUGUUGCAACGAUGAGGGCCUGGAAUGCGUUCCCACCGAAGAGAGUAACAUCACUAUGCAGAUCAUGCGGAUUAAGCCACAUCAGGGUCAACACAUCG…
CDS305	CBT3	CBT4	A100	AGGAAAUAAGAGAGAAAAGAAGAGUAAGAAGAAAUAUAAGAGCCACCAUGAACUUCUUGCUCUCAUGGGUGCACUGGAGCCUUGCAUUAUUGUUAUACUUACAUCACGCGAAGUGGUCCCAGGCCGCUCCCAUGGCCGAGGGAGGCGGUCAGAACCACCAUGAAGUCGUGAAGUUCAUGGACGUGUAUCAACGCUCAUAUUGCCAUCCAAUCGAGACUCUGGUGGACAUCUUCCAGGAGUACCCCGAUGAGAUUGAGUACAUCUUCAAGCCUAGCUGCGUUCCCCUGAUGCGGUGUGGUGGCUGCUGUAAUGAUGAGGGACUUGAAUGUGUGCCUACUGAAGAGAGCAAUAUCACCAUGCAGAUUAUGAGAAUCAAGCCGCACCAAGGGCAGCACAUUG…
CDS306	CBT3	CBT4	A100	AGGAAAUAAGAGAGAAAAGAAGAGUAAGAAGAAAUAUAAGAGCCACCAUGAACUUCUUGCUCAGUUGGGUGCAUUGGAGUCUUGCCCUGUUACUGUACCUGCACCAUGCCAAGUGGUCCCAGGCUGCACCAAUGGCCGAGGGCGGUGGCCAGAACCACCAUGAAGUUGUGAAGUUCAUGGAUGUGUACCAGAGGAGCUACUGUCACCCCAUCGAGACACUCGUGGAUAUCUUCCAAGAGUAUCCGGAUGAGAUAGAAUACAUAUUCAAGCCUUCCUGCGUCCCACUCAUGCGCUGCGGAGGGUGUUGCAAUGAUGAAGGACUGGAGUGUGUCCCAACCGAAGAGAGCAAUAUAACGAUGCAGAUUAUGCGGAUCAAGCCCCACCAGGGACAGCACAUAG…
CDS307	CBT3	CBT4	A100	AGGAAAUAAGAGAGAAAAGAAGAGUAAGAAGAAAUAUAAGAGCCACCAUGAACUUCCUCCUGUCUUGGGUGCACUGGAGCUUGGCACUUCUGUUGUAUCUACAUCACGCCAAGUGGAGCCAAGCGGCACCAAUGGCCGAGGGUGGAGGUCAGAACCAUCACGAAGUGGUCAAGUUCAUGGAUGUAUACCAGCGUUCCUACUGUCAUCCAAUUGAGACGCUAGUCGACAUCUUCCAAGAGUACCCUGAUGAGAUUGAGUACAUCUUCAAGCCCUCCUGUGUGCCACUAAUGAGAUGCGGCGGAUGUUGCAACGACGAAGGACUAGAGUGUGUGCCCACCGAAGAGAGCAAUAUCACUAUGCAGAUCAUGCGAAUUAAGCCACAUCAAGGACAGCACAUCG…
CDS308	CBT3	CBT4	A100	AGGAAAUAAGAGAGAAAAGAAGAGUAAGAAGAAAUAUAAGAGCCACCAUGAACUUCCUCUUAUCCUGGGUACAUUGGUCCUUGGCCCUGCUAUUAUAUCUGCAUCACGCCAAGUGGAGUCAAGCUGCCCCAAUGGCUGAAGGUGGAGGCCAGAAUCAUCACGAGGUGGUCAAGUUCAUGGACGUAUACCAGCGUAGCUACUGCCACCCCAUCGAGACAUUGGUGGACAUAUUCCAGGAGUACCCCGAUGAGAUCGAAUACAUCUUCAAGCCCUCUUGUGUUCCCCUUAUGAGAUGCGGCGGGUGCUGUAACGAUGAGGGCCUCGAAUGCGUGCCCACUGAAGAGAGUAAUAUCACAAUGCAGAUCAUGCGUAUCAAGCCACAUCAGGGACAGCAUAUCG…
CDS309	CBT3	CBT4	A100	AGGAAAUAAGAGAGAAAAGAAGAGUAAGAAGAAAUAUAAGAGCCACCAUGAACUUCCUGCUCUCCUGGGUGCACUGGUCACUAGCUCUCUUGCUGUAUCUACACCAUGCUAAGUGGUCACAGGCCGCACCCAUGGCAGAGGGCGGAGGGCAGAAUCACCAUGAGGUAGUGAAGUUCAUGGAUGUGUAUCAGAGGAGCUAUUGCCACCCUAUUGAGACGCUGGUCGACAUAUUCCAGGAAUAUCCCGAUGAGAUCGAAUAUAUCUUCAAGCCCAGUUGCGUACCUCUGAUGAGGUGUGGUGGGUGUUGCAAUGAUGAGGGAUUAGAAUGCGUGCCUACAGAGGAAUCUAACAUAACAAUGCAGAUUAUGAGGAUCAAGCCCCAUCAAGGGCAGCAUAUCG…
CDS310	CBT3	CBT4	A100	AGGAAAUAAGAGAGAAAAGAAGAGUAAGAAGAAAUAUAAGAGCCACCAUGAACUUCCUUCUGAGCUGGGUACAUUGGUCCCUGGCCCUCCUAUUGUACCUGCACCAUGCUAAGUGGUCCCAGGCAGCCCCUAUGGCCGAGGGUGGCGGACAGAACCAUCACGAGGUCGUGAAGUUCAUGGAUGUAUAUCAGCGUUCCUACUGCCACCCAAUAGAGACUCUUGUAGAUAUAUUCCAGGAAUAUCCCGAUGAGAUAGAAUAUAUCUUCAAGCCUAGCUGUGUGCCACUUAUGCGAUGUGGUGGCUGCUGUAACGAUGAAGGCCUAGAAUGCGUCCCCACGGAGGAAUCUAACAUCACUAUGCAGAUAAUGCGAAUCAAGCCUCACCAAGGCCAGCACAUAG…
Original	CBT3	CBT4	A100	AGGAAAUAAGAGAGAAAAGAAGAGUAAGAAGAAAUAUAAGAGCCACCAUGAACUUUCUGCUGUCUUGGGUGCAUUGGAGCCUUGCCUUGCUGCUCUACCUCCACCAUGCCAAGUGGUCCCAGGCUGCACCCAUGGCAGAAGGAGGAGGGCAGAAUCAUCACGAAGUGGUGAAGUUCAUGGAUGUCUAUCAGCGCAGCUACUGCCAUCCAAUCGAGACCCUGGUGGACAUCUUCCAGGAGUACCCUGAUGAGAUCGAGUACAUCUUCAAGCCAUCCUGUGUGCCCCUGAUGCGAUGCGGGGGCUGCUGCAAUGACGAGGGCCUGGAGUGUGUGCCCACUGAGGAGUCCAACAUCACCAUGCAGAUUAUGCGGAUCAAACCUCACCAAGGCCAGCACAUAG…

## Sheet: UTR
Name	5'-UTR	Sequence	3'-UTR	Sequence	Poly(A)	CDS
CBT3-CBT4	CBT3	AGGAAAUAAGAGAGAAAAGAAGAGUAAGAAGAAAUAUAAGAGCCAC	CBT4	UAGGAUUACAAGGAUGAUGAUGAUAAGGAUUACAAGGAUGAUGAUGAUAAGUGAUAAUAGGCUGCCUUCUGCGGGGCUUGCCUUCUGGCCAUGCCCUUCUUCUCUCCCUUGCACCUGUACCUCUUGGUCUUUGAAUAAAGCCUGAGUAGGAAGU	A100	CDS105
CBT3-CBC4	CBT3	AGGAAAUAAGAGAGAAAAGAAGAGUAAGAAGAAAUAUAAGAGCCAC	CBC4	UAGCUCGAGCUGGUACUGCAUGCACGCAAUGCUAGCUGCCCCUUUCCCGUCCUGGGUACCCCGAGUCUCCCCCGACCUCGGGUCCCAGGUAUGCUCCCACCUCCACCUGCCCCACUCACCACCUCUGCUAGUUCCAGACACCUCCCAAGCACGCAGCAAUGCAGCUCAAAACGCUUAGCCUAGCCACACCCCCACGGGAAACAGCAGUGAUUAACCUUUAGCAAUAAACGAAAGUUUAACUAAGCUAUACUAACCCCAGGGUUGGUCAAUUUCGUGCCAGCCACACCCUGGAGCUAGC	A100	CDS105
CBT3-CBN4	CBT3	AGGAAAUAAGAGAGAAAAGAAGAGUAAGAAGAAAUAUAAGAGCCAC	CBN4	UAGGCUGGAGCCUCGGUGGCCUAGCUUCUUGCCCCUUGGGCCUCCCCCCAGCCCCUCCUCCCCUUCCUGCACCCGUACCCCCGUGGUCUUUGAAUAAAGUCUGAGUGGGCGGC	A100	CDS105
CBT3-Cyn3U2	CBT3	AGGAAAUAAGAGAGAAAAGAAGAGUAAGAAGAAAUAUAAGAGCCAC	Cyn3U2	UAGAGCUCGCUUUCUUGCUGUCCAAUUUCUAUUAAAGGUUCCUUUGUUCCCUAAGUCCAACUACUAAACUGGGGGAUAUUAUGAAGGGCCUUGAGCAUCUGGAUUCUGCCUAAUAAAAAACAUUUAUUUUCAUUGCAGCUCGCUUUCUUGCUGUCCAAUUUCUAUUAAAGGUUCCUUUGUUCCCUAAGUCCAACUACUAAACUGGGGGAUAUUAUGAAGGGCCUUGAGCAUCUGGAUUCUGCCUAAUAAAAAACAUUUAUUUUCAUUGCU	A100	CDS105
CBT3-Cyn3U5	CBT3	AGGAAAUAAGAGAGAAAAGAAGAGUAAGAAGAAAUAUAAGAGCCAC	Cyn3U5	UAGCGCCGCCGCCGCCGCCGCCGGAGCCUGUCGCCGUCCUGUCCCCAGCCUGCUUGUGUCCCGUGAGGUUGUCAAUAAACCUGCCCUCGGGCUGCCGCCUCCC	A100	CDS105
CBP3-CBT4	CBP3	AGUCCCGCAGUCGGCGUCCAGCGGCUCUGCUUGUUCGUGUGUGUGUCGUUGCAGGCCUUAUUCAAGCUUGAGG	CBT4	UAGGAUUACAAGGAUGAUGAUGAUAAGGAUUACAAGGAUGAUGAUGAUAAGUGAUAAUAGGCUGCCUUCUGCGGGGCUUGCCUUCUGGCCAUGCCCUUCUUCUCUCCCUUGCACCUGUACCUCUUGGUCUUUGAAUAAAGCCUGAGUAGGAAGU	A100	CDS105
CBP3-CBC4	CBP3	AGUCCCGCAGUCGGCGUCCAGCGGCUCUGCUUGUUCGUGUGUGUGUCGUUGCAGGCCUUAUUCAAGCUUGAGG	CBC4	UAGCUCGAGCUGGUACUGCAUGCACGCAAUGCUAGCUGCCCCUUUCCCGUCCUGGGUACCCCGAGUCUCCCCCGACCUCGGGUCCCAGGUAUGCUCCCACCUCCACCUGCCCCACUCACCACCUCUGCUAGUUCCAGACACCUCCCAAGCACGCAGCAAUGCAGCUCAAAACGCUUAGCCUAGCCACACCCCCACGGGAAACAGCAGUGAUUAACCUUUAGCAAUAAACGAAAGUUUAACUAAGCUAUACUAACCCCAGGGUUGGUCAAUUUCGUGCCAGCCACACCCUGGAGCUAGC	A100	CDS105
CBP3-CBN4	CBP3	AGUCCCGCAGUCGGCGUCCAGCGGCUCUGCUUGUUCGUGUGUGUGUCGUUGCAGGCCUUAUUCAAGCUUGAGG	CBN4	UAGGCUGGAGCCUCGGUGGCCUAGCUUCUUGCCCCUUGGGCCUCCCCCCAGCCCCUCCUCCCCUUCCUGCACCCGUACCCCCGUGGUCUUUGAAUAAAGUCUGAGUGGGCGGC	A100	CDS105
CBP3-Cyn3U2	CBP3	AGUCCCGCAGUCGGCGUCCAGCGGCUCUGCUUGUUCGUGUGUGUGUCGUUGCAGGCCUUAUUCAAGCUUGAGG	Cyn3U2	UAGAGCUCGCUUUCUUGCUGUCCAAUUUCUAUUAAAGGUUCCUUUGUUCCCUAAGUCCAACUACUAAACUGGGGGAUAUUAUGAAGGGCCUUGAGCAUCUGGAUUCUGCCUAAUAAAAAACAUUUAUUUUCAUUGCAGCUCGCUUUCUUGCUGUCCAAUUUCUAUUAAAGGUUCCUUUGUUCCCUAAGUCCAACUACUAAACUGGGGGAUAUUAUGAAGGGCCUUGAGCAUCUGGAUUCUGCCUAAUAAAAAACAUUUAUUUUCAUUGCU	A100	CDS105
CBP3-Cyn3U5	CBP3	AGUCCCGCAGUCGGCGUCCAGCGGCUCUGCUUGUUCGUGUGUGUGUCGUUGCAGGCCUUAUUCAAGCUUGAGG	Cyn3U5	UAGCGCCGCCGCCGCCGCCGCCGGAGCCUGUCGCCGUCCUGUCCCCAGCCUGCUUGUGUCCCGUGAGGUUGUCAAUAAACCUGCCCUCGGGCUGCCGCCUCCC	A100	CDS105
Cyn5U3-CBT4	Cyn5U3	AGGAGAUAAAAAGCCAGCUCCAGCAGGCGCUGCUCACUCCUCCCCAUCCUCUCCCUCUGUCCCUCUGUCCCUCUGACCCUGCACUGUCCCAGCACC	CBT4	UAGGAUUACAAGGAUGAUGAUGAUAAGGAUUACAAGGAUGAUGAUGAUAAGUGAUAAUAGGCUGCCUUCUGCGGGGCUUGCCUUCUGGCCAUGCCCUUCUUCUCUCCCUUGCACCUGUACCUCUUGGUCUUUGAAUAAAGCCUGAGUAGGAAGU	A100	CDS105
Cyn5U3-CBC4	Cyn5U3	AGGAGAUAAAAAGCCAGCUCCAGCAGGCGCUGCUCACUCCUCCCCAUCCUCUCCCUCUGUCCCUCUGUCCCUCUGACCCUGCACUGUCCCAGCACC	CBC4	UAGCUCGAGCUGGUACUGCAUGCACGCAAUGCUAGCUGCCCCUUUCCCGUCCUGGGUACCCCGAGUCUCCCCCGACCUCGGGUCCCAGGUAUGCUCCCACCUCCACCUGCCCCACUCACCACCUCUGCUAGUUCCAGACACCUCCCAAGCACGCAGCAAUGCAGCUCAAAACGCUUAGCCUAGCCACACCCCCACGGGAAACAGCAGUGAUUAACCUUUAGCAAUAAACGAAAGUUUAACUAAGCUAUACUAACCCCAGGGUUGGUCAAUUUCGUGCCAGCCACACCCUGGAGCUAGC	A100	CDS105
Cyn5U3-CBN4	Cyn5U3	AGGAGAUAAAAAGCCAGCUCCAGCAGGCGCUGCUCACUCCUCCCCAUCCUCUCCCUCUGUCCCUCUGUCCCUCUGACCCUGCACUGUCCCAGCACC	CBN4	UAGGCUGGAGCCUCGGUGGCCUAGCUUCUUGCCCCUUGGGCCUCCCCCCAGCCCCUCCUCCCCUUCCUGCACCCGUACCCCCGUGGUCUUUGAAUAAAGUCUGAGUGGGCGGC	A100	CDS105
Cyn5U3-Cyn3U2	Cyn5U3	AGGAGAUAAAAAGCCAGCUCCAGCAGGCGCUGCUCACUCCUCCCCAUCCUCUCCCUCUGUCCCUCUGUCCCUCUGACCCUGCACUGUCCCAGCACC	Cyn3U2	UAGAGCUCGCUUUCUUGCUGUCCAAUUUCUAUUAAAGGUUCCUUUGUUCCCUAAGUCCAACUACUAAACUGGGGGAUAUUAUGAAGGGCCUUGAGCAUCUGGAUUCUGCCUAAUAAAAAACAUUUAUUUUCAUUGCAGCUCGCUUUCUUGCUGUCCAAUUUCUAUUAAAGGUUCCUUUGUUCCCUAAGUCCAACUACUAAACUGGGGGAUAUUAUGAAGGGCCUUGAGCAUCUGGAUUCUGCCUAAUAAAAAACAUUUAUUUUCAUUGCU	A100	CDS105
Cyn5U3-Cyn3U5	Cyn5U3	AGGAGAUAAAAAGCCAGCUCCAGCAGGCGCUGCUCACUCCUCCCCAUCCUCUCCCUCUGUCCCUCUGUCCCUCUGACCCUGCACUGUCCCAGCACC	Cyn3U5	UAGCGCCGCCGCCGCCGCCGCCGGAGCCUGUCGCCGUCCUGUCCCCAGCCUGCUUGUGUCCCGUGAGGUUGUCAAUAAACCUGCCCUCGGGCUGCCGCCUCCC	A100	CDS105
Cyn5U6-CBT4	Cyn5U6	AGAGCGGCCGCUUUUUCAGCAAGAUUAAGCCCAGGGCAGAGCCAUCUAUUGCUUACAUUUGCUUCUGACACAACUGUGUUCACUAGCAACCUCAAACAGACACC	CBT4	UAGGAUUACAAGGAUGAUGAUGAUAAGGAUUACAAGGAUGAUGAUGAUAAGUGAUAAUAGGCUGCCUUCUGCGGGGCUUGCCUUCUGGCCAUGCCCUUCUUCUCUCCCUUGCACCUGUACCUCUUGGUCUUUGAAUAAAGCCUGAGUAGGAAGU	A100	CDS105
Cyn5U6-CBC4	Cyn5U6	AGAGCGGCCGCUUUUUCAGCAAGAUUAAGCCCAGGGCAGAGCCAUCUAUUGCUUACAUUUGCUUCUGACACAACUGUGUUCACUAGCAACCUCAAACAGACACC	CBC4	UAGCUCGAGCUGGUACUGCAUGCACGCAAUGCUAGCUGCCCCUUUCCCGUCCUGGGUACCCCGAGUCUCCCCCGACCUCGGGUCCCAGGUAUGCUCCCACCUCCACCUGCCCCACUCACCACCUCUGCUAGUUCCAGACACCUCCCAAGCACGCAGCAAUGCAGCUCAAAACGCUUAGCCUAGCCACACCCCCACGGGAAACAGCAGUGAUUAACCUUUAGCAAUAAACGAAAGUUUAACUAAGCUAUACUAACCCCAGGGUUGGUCAAUUUCGUGCCAGCCACACCCUGGAGCUAGC	A100	CDS105
Cyn5U6-CBN4	Cyn5U6	AGAGCGGCCGCUUUUUCAGCAAGAUUAAGCCCAGGGCAGAGCCAUCUAUUGCUUACAUUUGCUUCUGACACAACUGUGUUCACUAGCAACCUCAAACAGACACC	CBN4	UAGGCUGGAGCCUCGGUGGCCUAGCUUCUUGCCCCUUGGGCCUCCCCCCAGCCCCUCCUCCCCUUCCUGCACCCGUACCCCCGUGGUCUUUGAAUAAAGUCUGAGUGGGCGGC	A100	CDS105
Cyn5U6-Cyn3U2	Cyn5U6	AGAGCGGCCGCUUUUUCAGCAAGAUUAAGCCCAGGGCAGAGCCAUCUAUUGCUUACAUUUGCUUCUGACACAACUGUGUUCACUAGCAACCUCAAACAGACACC	Cyn3U2	UAGAGCUCGCUUUCUUGCUGUCCAAUUUCUAUUAAAGGUUCCUUUGUUCCCUAAGUCCAACUACUAAACUGGGGGAUAUUAUGAAGGGCCUUGAGCAUCUGGAUUCUGCCUAAUAAAAAACAUUUAUUUUCAUUGCAGCUCGCUUUCUUGCUGUCCAAUUUCUAUUAAAGGUUCCUUUGUUCCCUAAGUCCAACUACUAAACUGGGGGAUAUUAUGAAGGGCCUUGAGCAUCUGGAUUCUGCCUAAUAAAAAACAUUUAUUUUCAUUGCU	A100	CDS105
Cyn5U6-Cyn3U5	Cyn5U6	AGAGCGGCCGCUUUUUCAGCAAGAUUAAGCCCAGGGCAGAGCCAUCUAUUGCUUACAUUUGCUUCUGACACAACUGUGUUCACUAGCAACCUCAAACAGACACC	Cyn3U5	UAGCGCCGCCGCCGCCGCCGCCGGAGCCUGUCGCCGUCCUGUCCCCAGCCUGCUUGUGUCCCGUGAGGUUGUCAAUAAACCUGCCCUCGGGCUGCCGCCUCCC	A100	CDS105

## Sheet: Poly(A) & Modification
Name	5'-UTR	3'-UTR	Modification	CDS	Poly(A)	Sequence
A100	Cyn5U6	Cyn3U5	m1ψ	CDS105	A100	AAAAAAAAAAAAAAAAAAAAAAAAAAAAAAAAAAAAAAAAAAAAAAAAAAAAAAAAAAAAAAAAAAAAAAAAAAAAAAAAAAAAAAAAAAAAAAAAAAAA
A120	Cyn5U6	Cyn3U5	m1ψ	CDS105	A120	AAAAAAAAAAAAAAAAAAAAAAAAAAAAAAAAAAAAAAAAAAAAAAAAAAAAAAAAAAAAAAAAAAAAAAAAAAAAAAAAAAAAAAAAAAAAAAAAAAAAAAAAAAAAAAAAAAAAAAAA
A60X2	Cyn5U6	Cyn3U5	m1ψ	CDS105	A60X2	AAAAAAAAAAAAAAAAAAAAAAAAAAAAAAAAAAAAAAAAAAAAAAAAAAAAAAAAAAAAAUGCAUAAAAAAAAAAAAAAAAAAAAAAAAAAAAAAAAAAAAAAAAAAAAAAAAAAAAAAAAAAAA
A40X3	Cyn5U6	Cyn3U5	m1ψ	CDS105	A40X3	AAAAAAAAAAAAAAAAAAAAAAAAAAAAAAAAAAAAAAAAAUGCAUAAAAAAAAAAAAAAAAAAAAAAAAAAAAAAAAAAAAAAAAGAUAUCAAAAAAAAAAAAAAAAAAAAAAAAAAAAAAAAAAAAAAAA
m1ψ	Cyn5U6	Cyn3U5	m1ψ	CDS105	A120	AAAAAAAAAAAAAAAAAAAAAAAAAAAAAAAAAAAAAAAAAAAAAAAAAAAAAAAAAAAAAAAAAAAAAAAAAAAAAAAAAAAAAAAAAAAAAAAAAAAAAAAAAAAAAAAAAAAAAAAA
ψ	Cyn5U6	Cyn3U5	ψ	CDS105	A120	AAAAAAAAAAAAAAAAAAAAAAAAAAAAAAAAAAAAAAAAAAAAAAAAAAAAAAAAAAAAAAAAAAAAAAAAAAAAAAAAAAAAAAAAAAAAAAAAAAAAAAAAAAAAAAAAAAAAAAAA
5moU	Cyn5U6	Cyn3U5	5moU	CDS105	A120	AAAAAAAAAAAAAAAAAAAAAAAAAAAAAAAAAAAAAAAAAAAAAAAAAAAAAAAAAAAAAAAAAAAAAAAAAAAAAAAAAAAAAAAAAAAAAAAAAAAAAAAAAAAAAAAAAAAAAAAA
m5C	Cyn5U6	Cyn3U5	m5C	CDS105	A120	AAAAAAAAAAAAAAAAAAAAAAAAAAAAAAAAAAAAAAAAAAAAAAAAAAAAAAAAAAAAAAAAAAAAAAAAAAAAAAAAAAAAAAAAAAAAAAAAAAAAAAAAAAAAAAAAAAAAAAAA
m6A	Cyn5U6	Cyn3U5	m6A	CDS105	A120	AAAAAAAAAAAAAAAAAAAAAAAAAAAAAAAAAAAAAAAAAAAAAAAAAAAAAAAAAAAAAAAAAAAAAAAAAAAAAAAAAAAAAAAAAAAAAAAAAAAAAAAAAAAAAAAAAAAAAAAA
