# Supplementary material for: Modifying VEGF-A mRNA by Combinatorial Optimization to Enhance Therapeutic Efficacy for Myocardial Infarction
Source: Research Square preprint supplement (doi:10.21203/rs.3.rs-8268281/v1), 2026-01-14
Supplement: Supplementary file 2 [file 780d688bd8fdcf0a684eeac7.xlsx]

## Sheet: Sheet1
Supplemental table 2 Primer sequences for DNA linearization
Manuscript Title: Modifying VEGF-A mRNA by Combinatorial Optimization to Enhance Therapeutic Efficacy for Myocardial Infarction
Journal Name: Cardiovascular Drugs and Therapy
Authors: Wei Wang, Zhenping Zhan, Lan Chen, Lei Wang, Shizheng Liu, Zirong Lin, Kanglin Wang
Corresponding Author: Kanglin Wang
Affiliation: Knature Bio-pharm Co., Ltd., No. 32 Meichong Lake Road, Hefei, P.R. China
Email: wangkanglin@knb-pharma.com
Primer Name	5'-3' sequence
CBT3-F	TAATACGACTCACTATAAGGAAATAAGAGA
CBC3-F	TAATACGACTCACTATAAGAATAAACTAGTATT
CBP3-F	TAATACGACTCACTATAAGTCCCGC
Cyn5U6-F	TAATACGACTCACTATAAGAGCGGC
Cyn5U3-F	TAATACGACTCACTATAAGGAGATAAAAAGCC
CBT4-R_A100	TTTTTTTTTTTTTTTTTTTTTTTTTTTTTTTTTTTTTTTTTTTTTTTTTTTTTTTTTTTTTTTTTTTTTTTTTTTTTTTTTTTTTTTTTTTTTTTTTTTTACTTCCTACTCAGGCTTTATTCAA
CBC4-R_A100	TTTTTTTTTTTTTTTTTTTTTTTTTTTTTTTTTTTTTTTTTTTTTTTTTTTTTTTTTTTTTTTTTTTTTTTTTTTTTTTTTTTTTTTTTTTTTTTTTTTTGCTAGCTCCAGGGTGTGG
CBN4-R_A100	TTTTTTTTTTTTTTTTTTTTTTTTTTTTTTTTTTTTTTTTTTTTTTTTTTTTTTTTTTTTTTTTTTTTTTTTTTTTTTTTTTTTTTTTTTTTTTTTTTTTGCCGCCCACTCAGACTTTAT
Cyn3U5-R_A100	TTTTTTTTTTTTTTTTTTTTTTTTTTTTTTTTTTTTTTTTTTTTTTTTTTTTTTTTTTTTTTTTTTTTTTTTTTTTTTTTTTTTTTTTTTTTTTTTTTTTGGGAGGCGGCAGCCCGAGGGCA
Cyn3U2-R_A100	TTTTTTTTTTTTTTTTTTTTTTTTTTTTTTTTTTTTTTTTTTTTTTTTTTTTTTTTTTTTTTTTTTTTTTTTTTTTTTTTTTTTTTTTTTTTTTTTTTTTAGCAATGAAAATAAATGTTTTTTATTAGGCA
CBT4-R_A120	TTTTTTTTTTTTTTTTTTTTTTTTTTTTTTTTTTTTTTTTTTTTTTTTTTTTTTTTTTTTTTTTTTTTTTTTTTTTTTTTTTTTTTTTTTTTTTTTTTTTTTTTTTTTTTTTTTTTTTTTACTTCCTACTCAGGCTTTATTCAA
CBT4-R_A60X2	TTTTTTTTTTTTTTTTTTTTTTTTTTTTTTTTTTTTTTTTTTTTTTTTTTTTTTTTTTTTATGCATTTTTTTTTTTTTTTTTTTTTTTTTTTTTTTTTTTTTTTTTTTTTTTTTTTTTTTTTTTTTACTTCCTACTCAGGCTTTATTCAA
CBT4-R_A40X3	TTTTTTTTTTTTTTTTTTTTTTTTTTTTTTTTTTTTTTTTGATATCTTTTTTTTTTTTTTTTTTTTTTTTTTTTTTTTTTTTTTTTATGCATTTTTTTTTTTTTTTTTTTTTTTTTTTTTTTTTTTTTTTTTACTTCCTACTCAGGCTTTATTCAA
